# Supplementary material for: Metabolomic Profile of Indonesian Betel Quids
Source: MDPI journal article supplement (doi:10.3390/biom12101469), 2022-10-13
Supplement: s1 [file s1]

## Metabolomic profile of Indonesian betel quids

Pangzhen Zhang<sup>1\*</sup>, Elizabeth Fitriana Sari<sup>2,3\*</sup>, Michael McCullough<sup>4</sup>, Nicola Cirillo<sup>4</sup>

### FIGURES, TABLES AND SUPPLEMENTARY MATERIAL

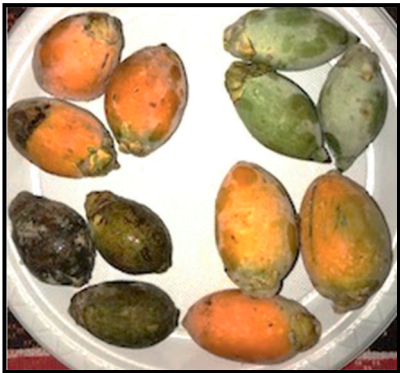

A.

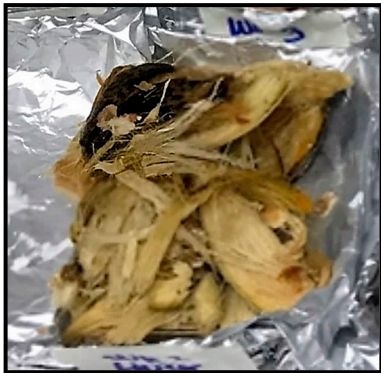

B.

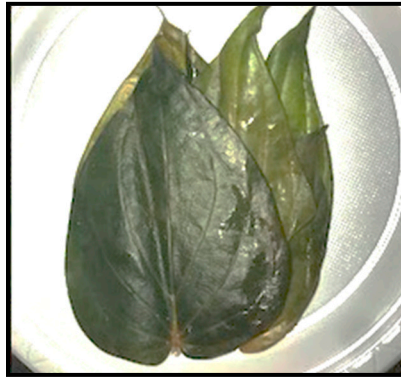

C.

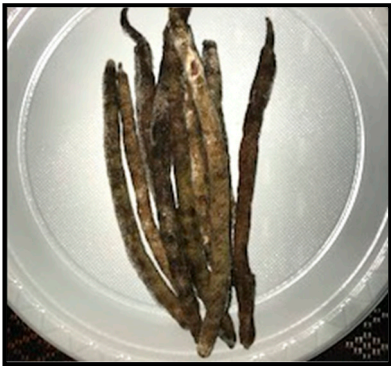

D.

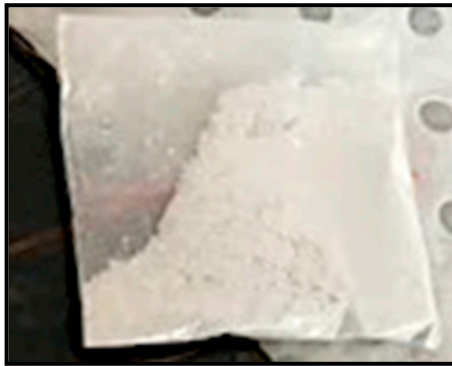

E.

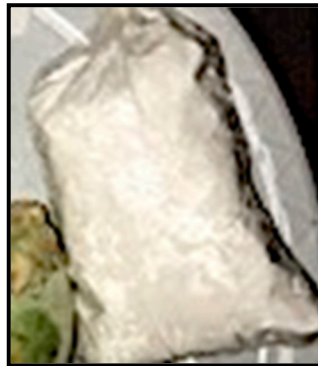

F.

**Supplementary Figure S1.** Areca nut (A), areca husk (B), *Piper betle* (Betel) leaf (C), Stem of *Piper betle* inflorescence (D), slaked line, powder (E) and paste (F)

**Table S1.** Non-targeted screening of Betel Quids ingredients using GC-MS (semi-quantified as ug 4-octanol equivalent per of sample)

| Compound                                            | Chemical        | Retenti<br>on time<br>(min) | RI       | RI <sub>b</sub> | Targ<br>et<br>m/z | QC m/z                  | BA       |          |          |         | NS            |          |           |         | WK      |          |           |         | WP       |          |          |         |
|-----------------------------------------------------|-----------------|-----------------------------|----------|-----------------|-------------------|-------------------------|----------|----------|----------|---------|---------------|----------|-----------|---------|---------|----------|-----------|---------|----------|----------|----------|---------|
|                                                     |                 |                             |          |                 |                   |                         | Husk     | Leaf     | AN       | Mix     | Husk          | Leaf     | AN        | Mix     | Husk    | Leaf     | AN        | Mix     | Husk     | SI       | AN       | Mix     |
| 2,3-Butanediol                                      | Alcohol         | 2.116                       | 806      | 806             | 45                | 43, 57                  | -        | -        | -        | -       | 5<br>2.1±59.1 | -        | 112.5±7.8 | 4±6.4   | -       | -        | -         | -       | -        | -        | 9.5±0.9  | -       |
| L-Lactic Acid                                       | Acid            | 2.257                       | 852      | 838             | 45                | 43                      | 29.6±3.0 | -        | -        | -       | 595.3±61.7    | -        | 86.5±16.3 | -       | -       | -        | -         | -       | -        | -        | 7.5±0.3  | -       |
| dl-Glyceraldehyde                                   | Aldehyde        | 2.267                       | 855      | -               | 43                | 61, 60                  | 9.8±1.0  | -        | -        | -       | 85.5±8.6      | 1.9±15.8 | 8.4±0.7   | -       | 1.6±0.3 | -        | -         | 0.4±0.1 | 11.6±0.8 | 28.4±1.3 | 6.6±0.7  | 2.3±0.2 |
| 2-Furanmethanol                                     | Alcohol         | 2.333                       | 876      | 875             | 98                | 81, 53, 69              | 2.8±0.3  | -        | -        | -       | 1.1±0.2       | -        | -         | -       | -       | -        | -         | -       | 6.3±0.8  | -        | 5.9±0.5  | 1.5±0.1 |
| Glycerin                                            | Alcohol         | 2.71                        | 967      | -               | 61                | 43,44                   | 33.4±1.8 | 27.7±1.4 | -        | 1.3±0.1 | 37.4±3.7      | 21.7±1.8 | 6.6±0.8   | 1.9±0.4 | 6.6±4.3 | 7.2±0.7  | -         | -       | 36.1±1.7 | 27.6±4.7 | 9.8±0.6  | -       |
| D-Limonene                                          | Monoterpe<br>ne | 3.125                       | 104<br>4 | 103<br>3        | 68                | 93,<br>79,136           | 2.9±0.7  | 3.0±0.7  | 13.8±3.6 | -       | 2.2±0.6       | 2±0.2    | 14.3±1.3  | 0.3±0.1 | 3.0±0.3 | 5.9±1.2  | 13.7±1.1  | 0.5±0.2 | 7.3±0.7  | 9.0±1.4  | 13.0±1.0 | 1.0±0.1 |
| Benzeneacetaldehyde                                 | Aldehyde        | 3.238                       | 106<br>3 | 105<br>1        | 91                | 120, 65                 | 0.9±0.1  | 3.5±0.2  | -        | -       | 0.6±0.1       | 1.3±0.1  | -         | -       | -       | 3.1±0.5  | -         | -       | 3.3±0.7  | 0.2±0.1  | 1.3±0.4  | -       |
| Linalool                                            | Monoterpe<br>ne | 3.484                       | 110<br>3 | 110<br>1        | 71                | 93, 55,<br>121,<br>136  | -        | 7.6±0.3  | -        | -       | -             | 5.7±0.2  | -         | -       | -       | 6.1±0.3  | -         | -       | -        | 2.6±1.0  | -        | -       |
| cis-β-Terpineol                                     | Monoterpe<br>ne | 3.587                       | 111<br>7 | 114<br>3        | 43                | 71, 93,<br>55           | -        | 1.8±0.1  | -        | -       | -             | 1.1±0.1  | -         | -       | -       | -        | -         | -       | -        | 2.3±0.2  | -        | -       |
| Phenylethyl Alcohol                                 | Alcohol         | 3.663                       | 112<br>7 | 112<br>0        | 91                | 122,65                  | 1.5±0.2  | 1.2±0.1  | -        | -       | 7.7±0.9       | 3.4±0.1  | -         | -       | 1.3±0.2 | -        | -         | -       | 0.7±0.1  | -        | 0.9±0.1  | -       |
| Methyl nicotinate                                   | Ester           | 3.852                       | 115<br>3 | 114<br>5        | 109               | 78, 137,<br>51          | 0.4±0.2  | 0.4±0.1  | 13.2±0.7 | -       | -             | -        | 6.7±0.4   | -       | -       | -        | 15.4±4.1  | -       | 2.6±0.3  | -        | 32.7±1.8 | 1.0±0.1 |
| 4H-Pyran-4-one, 2,3-dihydro-3,5-dihydroxy-6-methyl- | Benzenoid       | 3.88                        | 115<br>7 | 115<br>1        | 43                | 44, 101,<br>144         | 14.5±1.8 | 11.3±0.3 | 7.7±0.7  | -       | 15.1±2.2      | 1.2±0.3  | 6.6±0.6   | -       | 8.5±1.0 | 11.2±0.6 | 13.7±14.1 | -       | 46.6±1.8 | 9.1±0.5  | 86.5±3.1 | 3.7±0.4 |
| 5-Methoxypyrrolidin-2-one                           | Amine           | 4.021                       | 117<br>6 | -               | 84                | 60, 56,<br>115          | 2.0±0.1  | 25.6±2.6 | -        | -       | -             | 34.9±2.0 | -         | -       | 1.0±0.2 | 6.2±0.2  | -         | -       | 4.0±0.3  | 3.0±0.2  | -        | -       |
| 1,2-Benzenediol                                     | Benzenoid       | 4.097                       | 118<br>7 | 119<br>7        | 110               | 64, 81,<br>92           | 2.8±0.4  | 2.4±0.1  | -        | -       | -             | 3.1±0.9  | 9.2±1.5   | -       | 2.7±0.4 | 6.2±1.2  | -         | -       | -        | 8.1±1.9  | -        | -       |
| 4-Terpinenol                                        | Monoterpe<br>ne | 4.181                       | 119<br>8 | 119<br>1        | 71                | 93, 111,<br>154         | -        | 3.4±0.2  | -        | -       | -             | 2.1±0.1  | -         | -       | -       | -        | -         | -       | -        | 6.2±0.3  | -        | -       |
| Estragole                                           | Benzenoid       | 4.266                       | 120<br>9 | 120<br>6        | 148               | 147,<br>121,<br>117, 77 | -        | 3.8±0.1  | -        | -       | -             | 2.7±0.2  | -         | -       | -       | -        | -         | -       | -        | -        | -        | -       |
| 2,3-Dihydrobenzofuran                               | Benzenoid       | 4.332                       | 121<br>7 | 122<br>6        | 120               | 91, 65                  | 0.7±0.1  | 16.7±1.3 | -        | -       | 1.4±0.3       | 9.9±0.2  | -         | -       | 0.8±0.1 | 19.9±1.3 | -         | -       | -        | -        | 1.0±0.1  | -       |

|                                                                                                                                                  |                   |       |          |          |     |                                     |              |                 |         |             |          |                |         |             |              |                |         |             |               |                |               |              |
|--------------------------------------------------------------------------------------------------------------------------------------------------|-------------------|-------|----------|----------|-----|-------------------------------------|--------------|-----------------|---------|-------------|----------|----------------|---------|-------------|--------------|----------------|---------|-------------|---------------|----------------|---------------|--------------|
| 5-Hydroxymethylfurfural                                                                                                                          | Benzenoid         | 4.389 | 122<br>4 | 122<br>4 | 97  | 126,41,<br>69                       | 15.1±2<br>.3 | -               | -       | -           | 0.4±0.1  | -              | -       | -           | -            | -              | -       | -           | 92.2±11<br>.2 | -              | 18.3±1.<br>1  | 0.3±0.<br>1  |
| 1,2,3-Propanetriol, monoacetate                                                                                                                  | Ester             | 4.52  | 123<br>7 | 123<br>6 | 140 | 155, 96,<br>81, 53,<br>124          | 23.4±2<br>.5 | 34.8±2.7        | -       | -           | 54.0±2.5 | 1.5±0.3        | 21.2±1  | -           | 19.7±1<br>.6 | 4.7±0.9        | -       | 2.5±2.<br>0 | 7.6±1.5       | 5.3±1.1        | 82.9±32<br>.9 | -            |
| Phenol, 4-(2-propenyl)-                                                                                                                          | Benzenoid         | 4.615 | 124<br>1 | -        | 43  | 103, 61                             | 0.8±0.<br>1  | 271.7±9.8       | -       | 5.8±0.<br>2 | 1.1±0.1  | 275.3±18<br>.4 | -       | 5.5±0.<br>2 | -            | 24.5±1.4       | -       | 1.2±0.<br>1 | 1.5±0.2       | 6.8±0.1        | -             | -            |
| Safrrole                                                                                                                                         | Benzenoid         | 5.04  | 125<br>1 | 125<br>0 | -   | -                                   | -            | 2.7±0.2         | -       | -           | -        | 3.2±0.5        | -       | -           | -            | 2.1±0.4        | -       | -           | 2.1±0.2       | 761.6±25.<br>6 | 0.7±0.1       | 13.4±1<br>.6 |
| Decanoic acid, methyl ester                                                                                                                      | Ester             | 5.143 | 125<br>2 | 125<br>1 | 134 | 133,<br>107, 77                     | -            | -               | -       | -           | -        | -              | -       | 0.3±0.<br>1 | -            | -              | -       | -           | -             | -              | -             | -            |
| 2-Methoxy-4-vinylphenol                                                                                                                          | Benzenoid         | 5.172 | 127<br>9 | -        | 96  | 141, 94                             | 1.6±0.<br>2  | 6.9±0.4         | -       | -           | 5.8±0.7  | 3.8±0.1        | -       | -           | 2.1±0.<br>2  | 8.2±1.4        | -       | -           | 1.4±0.1       | 1.4±0.1        | -             | -            |
| Phenol, 4-(2-propenyl)-, acetate                                                                                                                 | Benzenoid         | 5.379 | 130<br>5 | 129<br>1 | 162 | 104,<br>131, 77,<br>135, 51         | -            | 147.9±12.<br>9  | -       | -           | -        | 17.8±0.7       | -       | -           | -            | 1.2±0.7        | -       | -           | -             | 3.8±0.2        | -             | -            |
| Eugenol                                                                                                                                          | Benzenoid         | 5.502 | 131<br>7 | 132<br>4 | 74  | 87, 143,<br>155                     | -            | 212.3±178<br>.2 | -       | -           | 0.7±0.1  | 9±0.8          | -       | -           | 0.7±0.<br>1  | 4±0.1          | -       | 0.8±0.<br>1 | 1.1±0.2       | 487.8±18.<br>0 | -             | 14.1±1<br>.6 |
| 3-Allyl-6-methoxyphenol                                                                                                                          | Benzenoid         | 5.634 | 132<br>1 | 132<br>4 | 150 | 135,<br>107, 77                     | 1.1±0.<br>1  | 39.5±9.9        | -       | 6.2±0.<br>4 | 1.4±0.1  | 252.8±16<br>.2 | -       | 5.4±0.<br>2 | 1.4±0.<br>1  | 356.5±17<br>.2 | -       | 8.6±1.<br>3 | 1.7±0.2       | 321±274.4      | -             | -            |
| alpha-Copaene                                                                                                                                    | Sesquiterpe<br>ne | 5.794 | 134<br>5 | 135<br>0 | 134 | 107,<br>176, 77                     | -            | 9.2±0.2         | -       | -           | -        | 6.8±0.7        | -       | -           | -            | 7.1±0.5        | -       | -           | -             | 285.2±1.0      | -             | 3.0±0.<br>2  |
| Methyleugenol                                                                                                                                    | Benzenoid         | 5.841 | 135<br>9 | 135<br>9 | 164 | 149,<br>77,131                      | -            | 2.1±0.1         | -       | -           | -        | 1.7±0.1        | -       | -           | -            | 1.6±0.1        | -       | -           | -             | 89.2±2.8       | -             | 1.1±0.<br>1  |
| 1H-Cyclopropa (a)naphthalene,<br>1a,2,3,5,6,7,7a,7b-octahydro-<br>1,1,7,7a-tetramethyl-, (1aR-<br>(1a.alpha.,7.alpha.,7a.alpha.,7b.al<br>pha.))- | Sesquiterpe<br>ne | 5.879 | 137<br>5 | 136<br>2 | 164 | 149,<br>103,<br>91,77,<br>55        | -            | 14.0±0.6        | -       | -           | -        | 9.5±0.8        | -       | -           | -            | 8.7±0.9        | -       | -           | -             | 169.1±7.2      | -             | 1.4±0.<br>1  |
| Methyl 5-formyl-1H-pyrrole-3-<br>carboxylate                                                                                                     | Benzenoid         | 5.983 | 139<br>4 | 138<br>7 | 161 | 119,<br>105, 93                     | -            | -               | -       | 0.8±0.<br>2 | -        | -              | -       | 1.4±0.<br>4 | -            | -              | -       | 1.6±0.<br>3 | -             | -              | -             | -            |
| α-Bergamotene                                                                                                                                    | Sesquiterpe<br>ne | 6.077 | 139<br>9 | 140<br>1 | 178 | 147,<br>163,<br>103,<br>107<br>105, | -            | 8.4±0.1         | -       | -           | -        | 5.0±0.5        | -       | -           | -            | 1.1±0.2        | -       | -           | -             | -              | -             | -            |
| alpha-gurjunene                                                                                                                                  | Sesquiterpe<br>ne | 6.124 | 140<br>3 | -        | 161 | 119, 91,<br>204                     | -            | -               | -       | -           | -        | -              | -       | -           | -            | -              | -       | -           | -             | 14.6±1.5       | -             | 1.1±0.<br>1  |
| α-Santalene                                                                                                                                      | Sesquiterpe<br>ne | 6.153 | 141<br>4 | -        | 122 | 153, 94                             | -            | 3.6±0.1         | -       | -           | -        | 2.1±0.3        | -       | -           | -            | -              | -       | -           | -             | -              | -             | -            |
| beta-Ylangene                                                                                                                                    | Sesquiterpe<br>ne | 6.219 | 142<br>3 | 141<br>6 | 93  | 119, 41,<br>69, 77                  | -            | 6.8±0.3         | -       | -           | -        | 3.6±0.3        | -       | -           | -            | 3.2±0.1        | -       | -           | -             | 23.1±0.2       | -             | -            |
| (E)-β-Caryophyllene                                                                                                                              | Sesquiterpe<br>ne | 6.266 | 142<br>8 | 141<br>3 | 204 | 161,<br>189,<br>105                 | -            | 36.6±1.3        | -       | -           | -        | 24.3±2.0       | -       | -           | -            | 2.1±1.0        | -       | -           | -             | 146±4.0        | -             | 1.2±0.<br>1  |
| cis-Muurola-3,5-diene                                                                                                                            | Sesquiterpe<br>ne | 6.341 | 143<br>0 | 142<br>4 | 94  | 93, 107,<br>79, 69,<br>121          | -            | 9.3±0.2         | -       | -           | -        | 5.4±0.4        | -       | -           | -            | 4.9±0.1        | -       | -           | -             | 35.1±0.6       | -             | -            |
| alpha-humulene                                                                                                                                   | Sesquiterpe<br>ne | 6.624 | 143<br>7 | 142<br>0 | 161 | 120,<br>105, 91                     | -            | 34.1±1.7        | -       | -           | -        | 24.2±1.9       | -       | -           | -            | 8.6±0.3        | -       | -           | -             | 55.7±1.5       | -             | -            |
| gamma-Amorphene                                                                                                                                  | Sesquiterpe<br>ne | 6.756 | 144<br>2 | 142<br>0 | 93  | 133, 69,<br>79, 120                 | -            | 65.9±0.7        | -       | -           | -        | 48.7±3.8       | -       | 0.8±0.<br>1 | -            | 19.4±1         | -       | -           | -             | 71.4±2.3       | -             | -            |
| γ-Cadinene                                                                                                                                       | Sesquiterpe<br>ne | 6.879 | 144<br>9 | 144<br>7 | 161 | 105, 93,<br>69                      | -            | 15.5±5.0        | -       | 2.3±0.<br>1 | -        | 67.9±5.1       | -       | 1.1±0.<br>1 | -            | 57.8±2.9       | -       | 0.9±0.<br>1 | -             | 54.7±8.0       | -             | 4.0±0.<br>2  |
| 2,4-Di-tert-butylphenol                                                                                                                          | Benzenoid         | 6.916 | 147<br>7 | 148<br>9 | 93  | 80, 121,<br>147                     | 6.7±0.<br>4  | 8.5±0.4         | 3.2±0.1 | -           | 6.4±0.5  | 8.8±0.2        | 3.4±0.2 | 0.7±0.<br>1 | 6.1±0.<br>1  | 8.1±0.3        | 3.8±0.2 | -           | 6.7±0.4       | -              | 3.0±0.1       | -            |

|                                                   |                   |        |          |          |     |                         |             |           |               |              |         |               |         |              |             |                |              |             |         |                 |         |             |
|---------------------------------------------------|-------------------|--------|----------|----------|-----|-------------------------|-------------|-----------|---------------|--------------|---------|---------------|---------|--------------|-------------|----------------|--------------|-------------|---------|-----------------|---------|-------------|
| 3-Allyl-6-methoxyphenyl acetate                   | Benzenoid         | 7.058  | 149<br>0 | 149<br>2 | 161 | 119,<br>105, 91,<br>204 | -           | 259.3±9.5 | -             | -            | -       | 162.6±6.<br>8 | -       | 0.5±0.<br>1  | -           | 446.7±15<br>.8 | -            | 1.5±0.<br>4 | -       | 1158.6±31<br>.9 | 1.1±0.5 | -           |
| Dodecanoic acid, methyl ester                     | Ester             | 7.058  | 150<br>2 | 150<br>7 | 161 | 105, 91,<br>119,<br>204 | -           | 1.3±0.1   | -             | 15.4±0<br>.5 | -       | 1.6±0.2       | -       | 15.7±2<br>.7 | -           | 2.1±0.1        | -            | -           | -       | 5.2±0.1         | -       | -           |
| Isocalamenene                                     | Sesquiterpe<br>ne | 7.284  | 150<br>5 | 150<br>2 | 191 | 57,<br>206              | -           | 2.1±0.2   | -             | -            | -       | 1.6±0.2       | -       | -            | -           | 1.8±0.1        | -            | -           | -       | 95.0±3.2        | -       | -           |
| Selina-3,7(11)-diene                              | Sesquiterpe<br>ne | 7.332  | 151<br>7 | -        | 164 | 149,<br>131,<br>206     | -           | 6.4±0.1   | -             | -            | -       | 5.1±0.2       | -       | -            | -           | -              | -            | -           | -       | -               | -       | -           |
| Dodecanoic acid                                   | Acid              | 7.407  | 151<br>7 | 152<br>1 | 74  | 87, 143,<br>171, 55     | 1.6±0.<br>1 | 0.7±0.2   | -             | -            | 0.6±0.1 | 1.5±0.3       | 1.0±0.2 | -            | 0.8±0.<br>2 | 1.4±0.2        | 1.1±0.2      | -           | 0.7±0.1 | 1.6±0.2         | -       | -           |
| w-Amorphene                                       | Sesquiterpe<br>ne | 7.407  | 153<br>7 | 152<br>7 | 159 | 202                     | -           | 0.8±0.2   | -             | -            | -       | -             | -       | -            | -           | 0.7±0.1        | -            | -           | -       | 24.3±0.7        | -       | -           |
| Isovanillic acid                                  | Acid              | 7.427  | 154<br>1 | 514<br>2 | 161 | 122,<br>107, 91,<br>204 | 2<br>.4±0.8 | 0.4±0.1   | -             | -            | 1.4±1.6 | -             | -       | -            | 5.5±0.<br>2 | -              | -            | -           | 1.4±0.4 | -               | -       | -           |
| nerolidol ?                                       | Sesquiterpe<br>ne | 7.567  | 154<br>7 | 156<br>2 | 73  | 60, 12,<br>157,<br>200  | -           | 1.5±0.2   | -             | -            | -       | 1.2±0.2       | -       | -            | -           | 0.8±0.1        | -            | -           | -       | 16.9±0.2        | -       | -           |
| 1,3,5-Benzenetriol                                | Benzenoid         | 7.775  | 154<br>7 | 154<br>0 | 119 | 105,<br>161,<br>204     | -           | -         | 56.2±15<br>.0 | -            | -       | -             | 6.7±4.9 | -            | -           | -              | 55.9±9.<br>7 | -           | -       | -               | -       | -           |
| Spathulenol                                       | Sesquiterpe<br>ne | 8.001  | 154<br>9 | -        | 168 | 153, 97,<br>125         | -           | 2.9±0.2   | -             | -            | -       | 2.8±0.2       | -       | -            | -           | 71.2±58.<br>8  | -            | -           | -       | 287.7±238<br>.6 | -       | -           |
| 4-Allyl-1,2-diacetoxybenzene                      | Benzenoid         | 8.407  | 156<br>1 | 156<br>5 | 69  | 93, 107,<br>136         | 3.3±0.<br>1 | 42.9±0.9  | -             | -            | 2.2±0.2 | -             | -       | -            | 1.6±0.<br>2 | 372.4±11<br>.1 | -            | -           | -       | -               | 3.6±0.2 | -           |
| unknown sesquiterpene 1                           | Sesquiterpe<br>ne | 8.831  | 157<br>8 | -        | 126 | 85, 69,<br>97           | -           | -         | -             | -            | -       | 2.4±0.1       | -       | -            | -           | 1.5±0.3        | -            | -           | -       | 2.8±0.6         | -       | -           |
| alpha.-Cadinol                                    | Sesquiterpe<br>ne | 8.963  | 159<br>7 | 158<br>1 | 43  | 91, 119,<br>205         | -           | 0.6±0.1   | -             | -            | -       | 0.5±0.1       | -       | -            | -           | 0.4±0.3        | -            | -           | -       | 4.6±0.4         | -       | -           |
| unknown sesquiterpene 2                           | Sesquiterpe<br>ne | 9.029  | 162<br>8 | 163<br>8 | 150 | 192,<br>133             | -           | 0.7±0.1   | -             | -            | -       | 1.0±0.2       | -       | -            | -           | 0.4±0.1        | -            | -           | -       | 1.3±1.1         | -       | -           |
| unknown sesquiterpene 3                           | Sesquiterpe<br>ne | 9.397  | 166<br>0 | -        | 161 | 120,<br>105,<br>204     | -           | 1.7±0.3   | -             | -            | -       | -             | -       | -            | -           | 1.1±0.1        | -            | -           | -       | 12.9±4          | -       | -           |
| Tetradecanoic acid, methyl ester.                 | Ester             | 9.652  | 166<br>9 | 166<br>2 | 43  | 95, 121,<br>204         | -           | -         | -             | 26.7±1<br>.2 | -       | 0.9±0.1       | -       | 27.2±4<br>.8 | -           | -              | -            | 9.8±0.<br>2 | -       | -               | -       | -           |
| unknown sesquiterpene 4                           | Sesquiterpe<br>ne | 9.68   | 167<br>4 | -        | 43  | 79, 93,<br>105          | -           | -         | -             | -            | -       | -             | -       | -            | -           | -              | -            | -           | -       | 1.6±1.4         | -       | -           |
| 4-((1E)-3-Hydroxy-1-propenyl)-<br>2-methoxyphenol | Benzenoid         | 9.935  | 170<br>2 | -        | 109 | 91, 159,<br>220         | 6.1±0.<br>3 | 1.2±0.1   | -             | -            | 8.6±1.1 | -             | -       | -            | 1<br>.5±0.6 | 0.9±0.1        | -            | -           | 4.2±0.1 | 0.9±0.1         | -       | -           |
| Tetradecanoic acid                                | Acid              | 10.076 | 171<br>9 | 171<br>9 | 74  | 87, 143,<br>199         | 1.3±0.<br>3 | 0.7±0.1   | -             | -            | -       | 1.9±0.2       | 1.6±0.2 | -            | 1±0.2       | 1.8±0.4        | 2.1±0.2      | -           | -       | -               | -       | -           |
| Tetradecanoic acid, ethyl ester                   | Ester             | 10.661 | 172<br>1 | -        | 43  | 91, 123,<br>220         | 8.3±0.<br>9 | -         | -             | -            | 0.9±0.1 | 2.8±0.3       | -       | -            | -           | -              | -            | -           | 2.8±0.2 | -               | -       | -           |
| Syringic acid                                     | Benzenoid         | 10.794 | 173<br>8 | 172<br>9 | 137 | 180,<br>124, 73,<br>91  | 4.1±0.<br>4 | -         | -             | -            | 2.1±0.2 | -             | -       | -            | 1.5±0.<br>1 | -              | -            | -           | 2.4±0.2 | -               | -       | -           |
| Pentadecanoic acid                                | Acid              | 11.632 | 174<br>7 | 175<br>1 | 73  | 60, 129,<br>228         | 0.6±0.<br>1 | -         | -             | -            | 1.3±0.3 | -             | -       | -            | 1±0.1       | -              | -            | -           | -       | -               | -       | -           |
| Pentadecanoic acid, ethyl ester                   | Ester             | 12.236 | 178<br>6 | 179<br>0 | 88  | 101,<br>157,<br>256     | 2.4±0.<br>2 | -         | -             | -            | 1.7±0.2 | -             | -       | -            | -           | -              | -            | -           | 2.2±0.2 | -               | -       | -           |
| Hexadecanoic acid, methyl ester                   | Ester             | 12.773 | 179<br>5 | -        | 198 | 183,<br>127,<br>109     | 0.9±0.<br>1 | 1.7±0.1   | -             | 17.9±0<br>.6 | 0.8±0.1 | 6.3±0.6       | -       | 16.4±2<br>.9 | -           | 3.5±0.3        | -            | 6.4±0.<br>1 | 1.0±0.2 | 3.1±0.1         | -       | 0.8±0.<br>2 |

|                                                            |           |        |          |          |     |                            |              |          |         |             |          |          |         |             |              |          |         |             |              |          |         |             |
|------------------------------------------------------------|-----------|--------|----------|----------|-----|----------------------------|--------------|----------|---------|-------------|----------|----------|---------|-------------|--------------|----------|---------|-------------|--------------|----------|---------|-------------|
| Methyl 3-(3,5-di-tert-butyl-4-hydroxyphenyl)propionate     | Benzenoid | 12.896 | 184<br>8 | 185<br>1 | 73  | 60, 129,<br>242            | 2±0.1        | -        | 0.8±0.2 | -           | 1.8±0.2  | 2.2±0.3  | 0.8±0.1 | -           | -            | -        | 0.9±0.1 | -           | -            | 2.1±0.1  | 0.7±0.1 | -           |
| n-Hexadecanoic acid                                        | Acid      | 13.282 | 188<br>6 | 189<br>0 | 88  | 101,<br>157,<br>270        | 8.7±0.<br>4  | 12.4±1.9 | -       | -           | 13.7±1.6 | 22.7±3.5 | 1.6±0.1 | -           | 12.8±1<br>.1 | 15.5±1.1 | 2.4±0.1 | -           | 8.3±0.7      | 14.7±0.6 | 1.3±0.4 | -           |
| Hexadecanoic acid, ethyl ester                             | Ester     | 13.896 | 191<br>9 | 192<br>1 | 74  | 87, 143,<br>227,<br>270    | 39.5±3<br>.8 | 3.0±0.1  | -       | -           | 22.3±2.4 | 12.1±0.8 | -       | -           | 2.0±1.<br>1  | 1.1±0.1  | -       | -           | 89.5±4.<br>4 | 2.1±0.1  | -       | -           |
| Heptadecanoic acid, methyl ester                           | Ester     | 14.443 | 192<br>7 | 194<br>3 | 277 | 292,<br>219,<br>147        | -            | -        | -       | -           | -        | -        | -       | -           | -            | -        | -       | -           | -            | -        | -       |             |
| Heptadecanoic acid                                         | Acid      | 14.952 | 195<br>0 | 195<br>1 | 73  | 60, 129,<br>256            | -            | -        | -       | -           | 0.5±0.2  | -        | -       | -           | -            | -        | -       | -           | -            | -        | -       |             |
| Heptadecanoic acid, ethyl ester                            | Ester     | 15.574 | 198<br>7 | 199<br>1 | 88  | 101,<br>157,<br>284        | 1.4±0.<br>1  | -        | -       | -           | 1.1±0.2  | -        | -       | -           | -            | -        | -       | -           | 3.2±0.1      | -        | -       | -           |
| 8,11-Octadecadienoic acid, methyl ester                    | Ester     | 15.6   | 202<br>0 | 202<br>2 | 74  | 87, 143,<br>241,<br>284    | -            | 0.4±0.1  | -       | 8.6±0.<br>3 | -        | 1.7±0.1  | -       | 8.5±1.<br>6 | -            | 0.5±0.1  | -       | -           | 1±0.2        | -        | -       | 0.6±0.<br>1 |
| 9,12,15-Octadecatrienoic acid, methyl ester, (Z,Z,Z)-      | Ester     | 15.678 | 205<br>0 | 206<br>5 | 73  | 129,<br>270                | -            | 1.0±0.1  | -       | 2.0±0.<br>1 | 0.5±0.1  | 3.2±0.4  | -       | 1.7±0.<br>4 | -            | 1.6±0.2  | -       | -           | -            | 0.6±0.1  | -       | -           |
| 9-Octadecenoic acid, methyl ester, (E)-                    | Ester     | 15.716 | 208<br>7 | 208<br>9 | 88  | 101, 55,<br>298            | -            | 0.7±0.1  | -       | 9.5±0.<br>1 | 0.5±0.1  | 2.5±0.3  | -       | 9.1±1.<br>5 | -            | 1.2±0.2  | 0.8±0.2 | 3.9±0.<br>1 | 0.5±0.1      | 1.4±0.1  | -       | 0.3±0.<br>1 |
| Phytol                                                     | Diterpene | 15.848 | 208<br>9 | -        | 67  | 81, 95,<br>294             | -            | -        | -       | 0.7±0.<br>1 | 0.7±0.1  | 82.4±5.1 | -       | 0.7±0.<br>1 | -            | 35.2±2.6 | -       | -           | 2.8±0.3      | 8.1±0.3  | -       | -           |
| Methyl stearate                                            | Ester     | 16.121 | 209<br>3 | 209<br>2 | 79  | 67, 95,<br>108,<br>292     | -            | -        | -       | 2.8±0.<br>2 | -        | 2.5±0.2  | -       | 2.8±0.<br>5 | -            | 1.1±0.1  | -       | -           | -            | -        | -       | -           |
| 9,12-Octadecadienoic acid (Z,Z)-                           | Acid      | 16.168 | 209<br>6 | 208<br>4 | 55  | 69, 83,<br>264             | 3.7±0.<br>1  | 3.7±0.7  | -       | -           | 7.1±1.0  | 7.8±2.1  | -       | -           | 3.7±0.<br>5  | 3.1±0.5  | -       | -           | 7.2±0.2      | 9.0±0.2  | -       | -           |
| 9,12,15-Octadecatrienoic acid, (Z,Z,Z)-                    | Acid      | 16.282 | 210<br>4 | 210<br>5 | 71  | 81, 57,<br>123             | 3.8±0.<br>3  | 23.7±4   | -       | -           | 7.5±0.7  | 19.2±5.9 | -       | -           | 3.2±0.<br>5  | 23.5±1.7 | -       | -           | 7.1±0.3      | 6.8±0.7  | -       | -           |
| Octadecanoic acid                                          | Acid      | 16.659 | 212<br>0 | 211<br>7 | 74  | 87, 143,<br>298            | 0.4±0.<br>4  | -        | -       | -           | 0.3±0.1  | -        | -       | -           | 0.2±0.<br>1  | -        | -       | -           | -            | -        | -       | -           |
| Linoleic acid ethyl ester                                  | Ester     | 16.697 | 212<br>3 | 212<br>6 | 67  | 81, 95,<br>55, 43          | 13.4±1<br>.3 | 1.7±0.1  | -       | -           | 8.5±1.0  | 5.5±0.6  | -       | -           | 0.9±0.<br>5  | -        | -       | -           | 41.7±2.<br>6 | 2.3±0.1  | -       | -           |
| Ethyl Oleate                                               | Ester     | 16.8   | 213<br>0 | 213<br>4 | 41  | 79, 67,<br>55, 95,<br>108  | 15.3±1<br>.3 | -        | -       | -           | 9.8±1.0  | 4.3±0.6  | -       | -           | 0.6±0.<br>3  | 1.0±0.2  | -       | -           | 28.2±1.<br>5 | 2.1±0.4  | -       | -           |
| Octadecanoic acid, ethyl ester                             | Ester     | 17.254 | 215<br>2 | 215<br>8 | 43  | 73, 55,<br>60, 129,<br>284 | 5.7±0.<br>5  | 1.4±0.1  | -       | -           | 3.3±0.4  | 5.4±0.4  | -       | -           | -            | -        | -       | -           | 6.8±0.3      | 0.5±0.1  | -       | -           |
| Phytol, acetate                                            | Ester     | 17.564 | 215<br>4 | 215<br>5 | 67  | 81, 95,<br>208             | 0.6±0.<br>1  | 5.8±0.1  | -       | -           | -        | 17.6±0.9 | -       | -           | -            | 2.5±0.1  | -       | -           | -            | -        | -       | -           |
| Tetradecanoic acid, 2,3-dihydroxypropyl ester              | Ester     | 19.027 | 216<br>1 | 218<br>0 | 55  | 41, 69,<br>88, 97          | -            | -        | -       | 1.9±0.<br>2 | -        | -        | -       | 2.1±0.<br>5 | -            | -        | -       | -           | -            | -        | -       | -           |
| Tetradecanoic acid, 2-hydroxy-1-(hydroxymethyl)ethyl ester | Ester     | 19.177 | 218<br>8 | 218<br>8 | 88  | 101,<br>157,<br>312        | -            | -        | -       | -           | -        | -        | -       | 0.3±0.<br>1 | -            | -        | -       | -           | -            | -        | -       | -           |
| Eicosanoic acid, methyl ester                              | Ester     | 19.442 | 220<br>6 | 221<br>8 | 43  | 68, 123,<br>95, 278        | -            | -        | -       | -           | -        | -        | -       | 0.3±0.<br>1 | -            | -        | -       | -           | -            | -        | -       | -           |

|                                                           |       |        |          |          |     |                         |             |         |   |             |         |         |   |             |             |         |         |             |         |         |   |   |
|-----------------------------------------------------------|-------|--------|----------|----------|-----|-------------------------|-------------|---------|---|-------------|---------|---------|---|-------------|-------------|---------|---------|-------------|---------|---------|---|---|
| 9-Octadecenamide, (Z)-                                    | Amine | 19.941 | 229<br>5 | -        | 211 | 43, 57,<br>98, 74       | 4.8±2.<br>6 | 6.1±0.6 | - | 0.4±0.<br>1 | 4.8±0.3 | 8.6±0.5 | - | -           | 4.6±0.<br>3 | 8.0±1.0 | 0.9±0.2 | 0.3±0.<br>1 | 5.6±1.2 | 4.4±0.6 | - | - |
| Eicosyl acetate                                           | Ester | 20.733 | 230<br>5 | -        | 211 | 98, 43,<br>57, 74       | -           | 0.8±0.1 | - | -           | -       | 3.0±0.2 | - | -           | -           | 0.5±0.1 | -       | -           | -       | -       | - | - |
| Hexadecanoic acid, 2-hydroxy-1-(hydroxymethyl)ethyl ester | Ester | 22.299 | 232<br>1 | 232<br>9 | 74  | 87, 143,<br>283,<br>326 | 1.2±0.<br>1 | 4.8±0.3 | - | 0.7±0.<br>1 | 0.5±0.1 | 5.1±0.2 | - | 0.7±0.<br>1 | 0.9±0.<br>1 | 6.2±0.3 | -       | -           | 1.9±0.3 | 1.8±3.1 | - | - |
| Glyceryl monolinoleate                                    | Ester | 24.94  | 235<br>2 | -        | 59  | 72, 41,<br>126          | -           | 2.0±0.2 | - | 0.9±0.<br>1 | -       | 2.4±0.4 | - | 0.9±0.<br>2 | -           | 1.8±0.2 | -       | -           | 1.2±0.2 | 3.2±0.2 | - | - |
| β-Glyceryl monostearate                                   | Ester | 25.015 | 240<br>2 | 241<br>0 | 43  | 57, 97,<br>340          | -           | 2.5±0.2 | - | 1.9±0.<br>1 | -       | 5.2±1.0 | - | 2.0±0.<br>5 | -           | 5.9±0.3 | -       | -           | -       | -       | - | - |

All compounds were semi-quantified as 4-octanol equivalent. RI, retention index experimental; RI<sub>db</sub>, retention index database.
